# Supplementary material for: Structural basis of adhesion GPCR GPR110 activation by stalk peptide and G-proteins coupling
Source: PubMed Central journal article supplement (PMC9489763; doi:10.1038/s41467-022-33173-4), 2022-09-20
Supplement: 41467_2022_33173_MOESM1_ESM.pdf [file 41467_2022_33173_MOESM1_ESM.pdf]

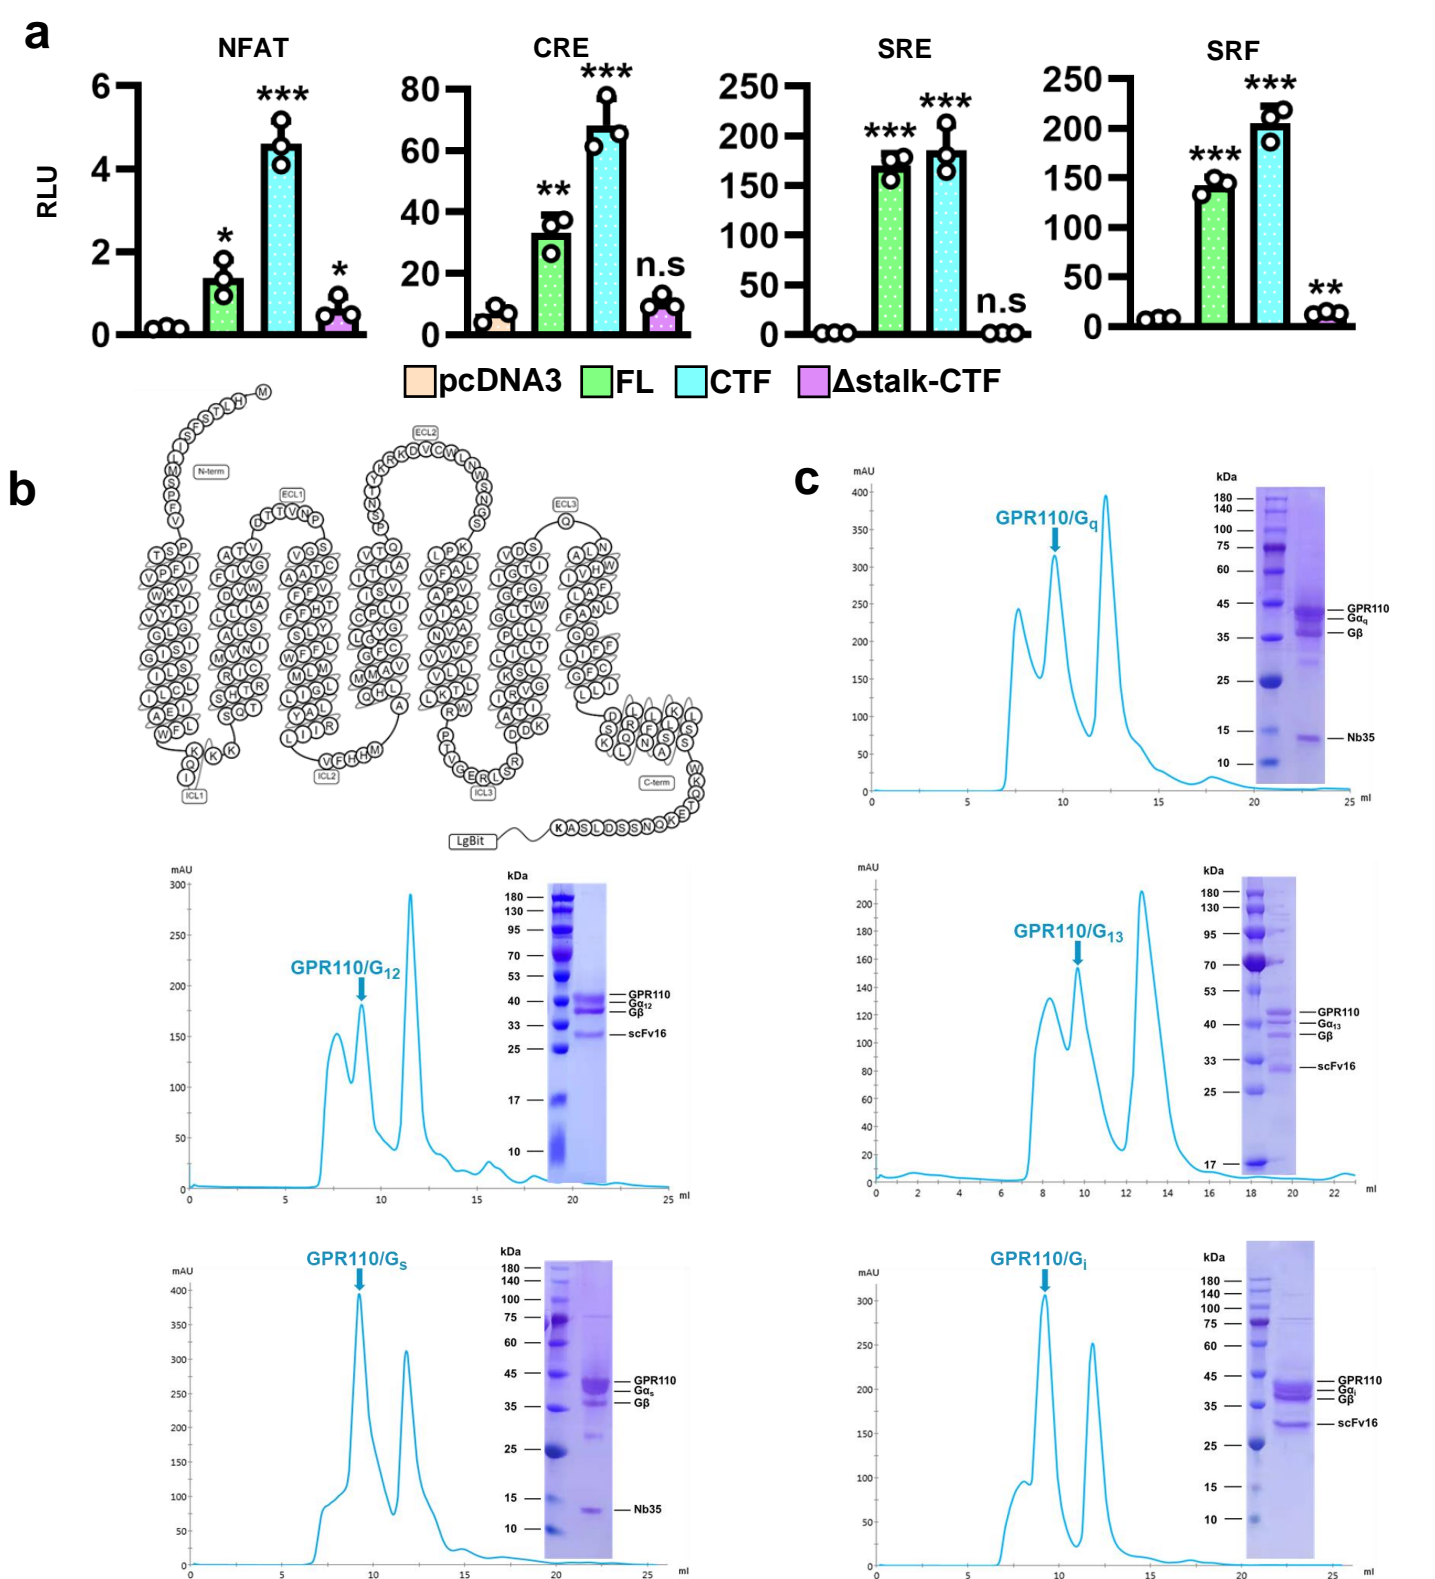

**Supplementary Fig. 1. GPR110 is able to couple with all 4 major G-protein signaling pathways.** **a**, Reporter assays of GPR110 constructs. FL, full-length. CTF, C-terminus fragment. RLU, relative luciferase unit. Data are presented as mean values  $\pm$  SD;  $n=3$  independent samples. n.s. no significant; \*,  $P < 0.05$ ; \*\*,  $P < 0.01$ ; \*\*\*,  $P < 0.001$ . Data between WT and mutants were analyzed by two-sided test (from left to right for NFAT group,  $P = 0.0444$ ,  $P < 0.001$  and  $P = 0.0457$ ; from left to right for CRE group,  $P = 0.0021$ ,  $P < 0.001$  and  $P = 0.1498$ ; from left to right for SRE group,  $P < 0.001$ ,  $P < 0.001$  and  $P = 0.1755$ ; from left to right for SRF group,  $P < 0.001$ ,  $P < 0.001$  and  $P = 0.0078$ ). Source data are provided as a Source Data file. **b**, Snake-shape diagram of the GPR110 construct used in complex assembling, the diagram was adopted from GPCRdb. **c**, Size exclusion column profile of GPR110/G-protein complex. Experiments were repeated independently 3 times with similar results. Source data are provided as a Source Data file.



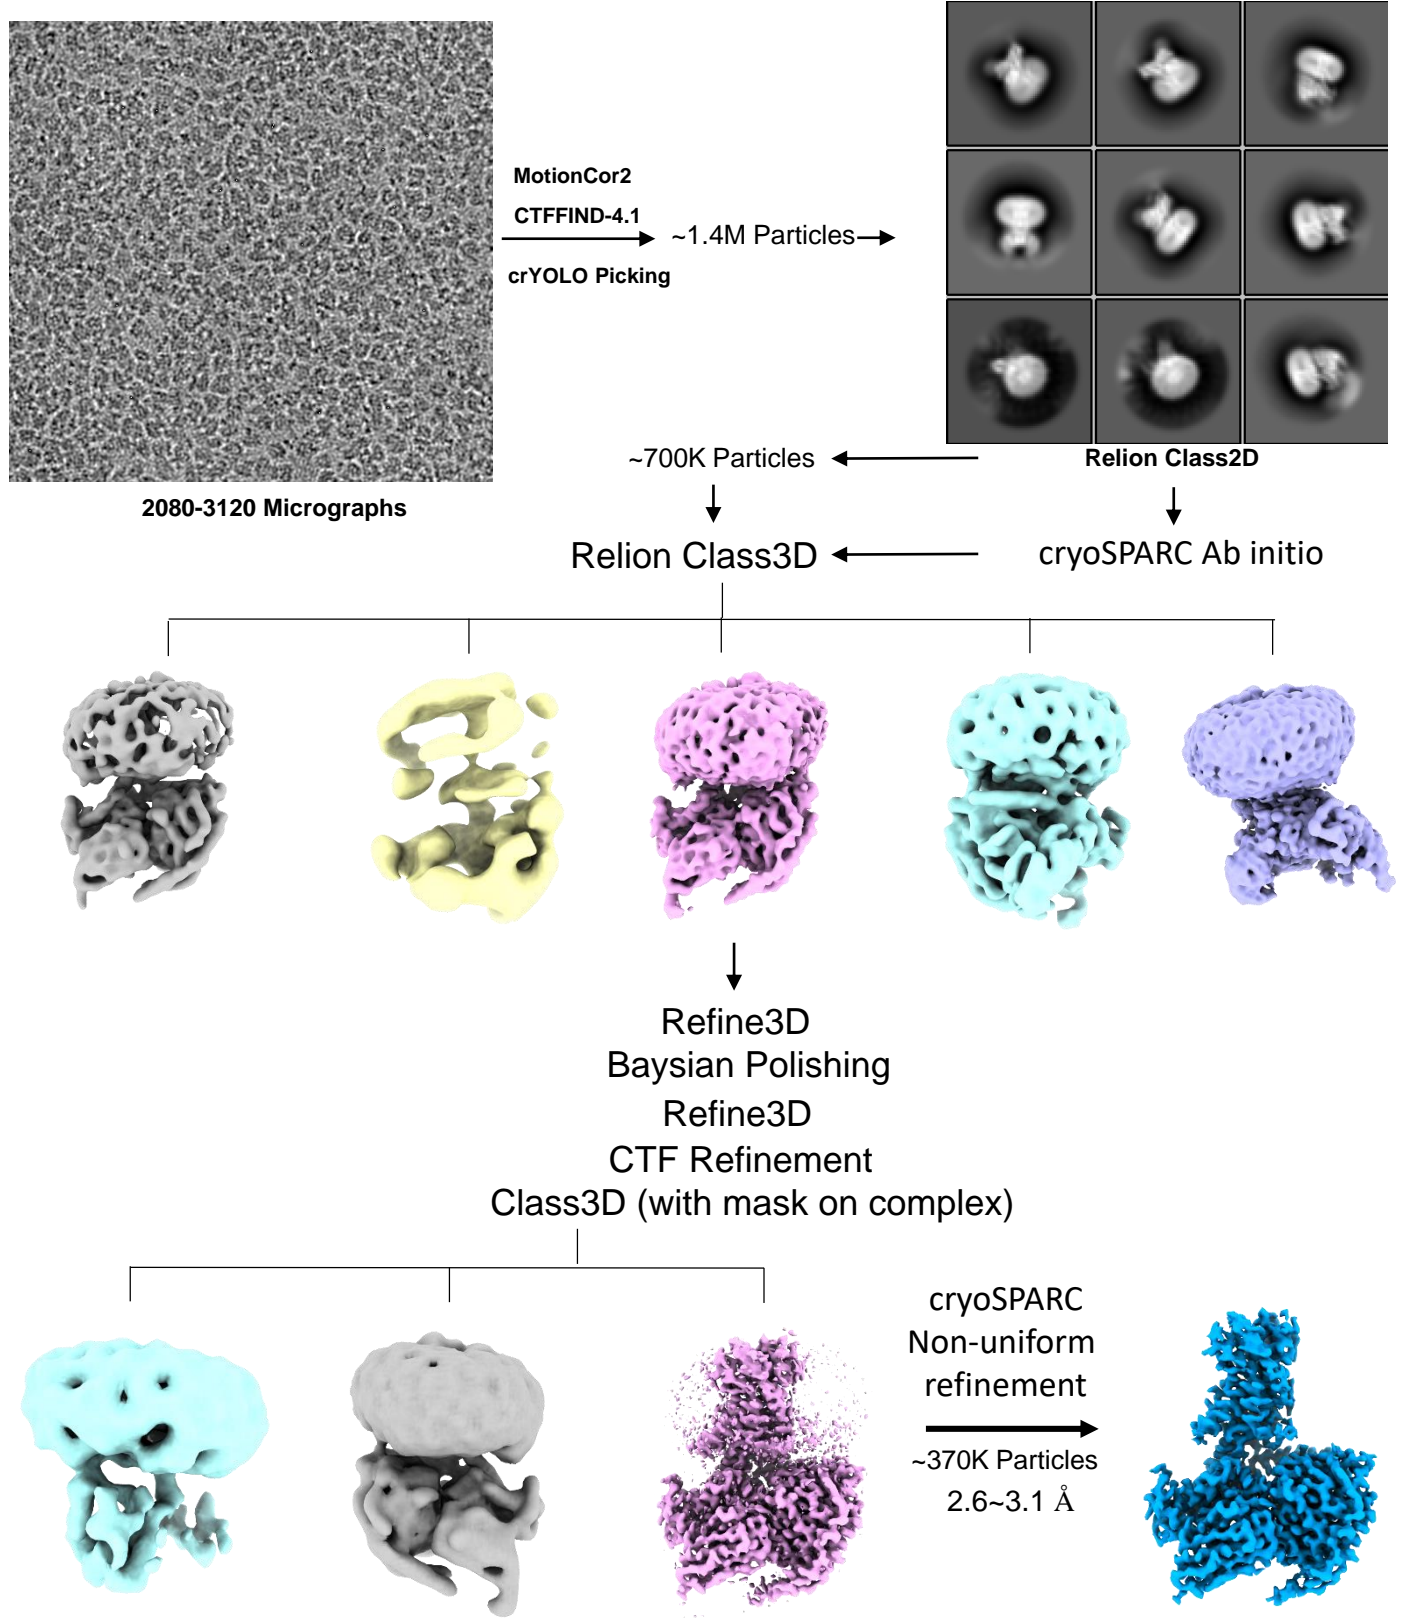

Supplementary Fig. 3. Flow-chart of cryo-EM data process of GPR110/G-protein complexes.

**a**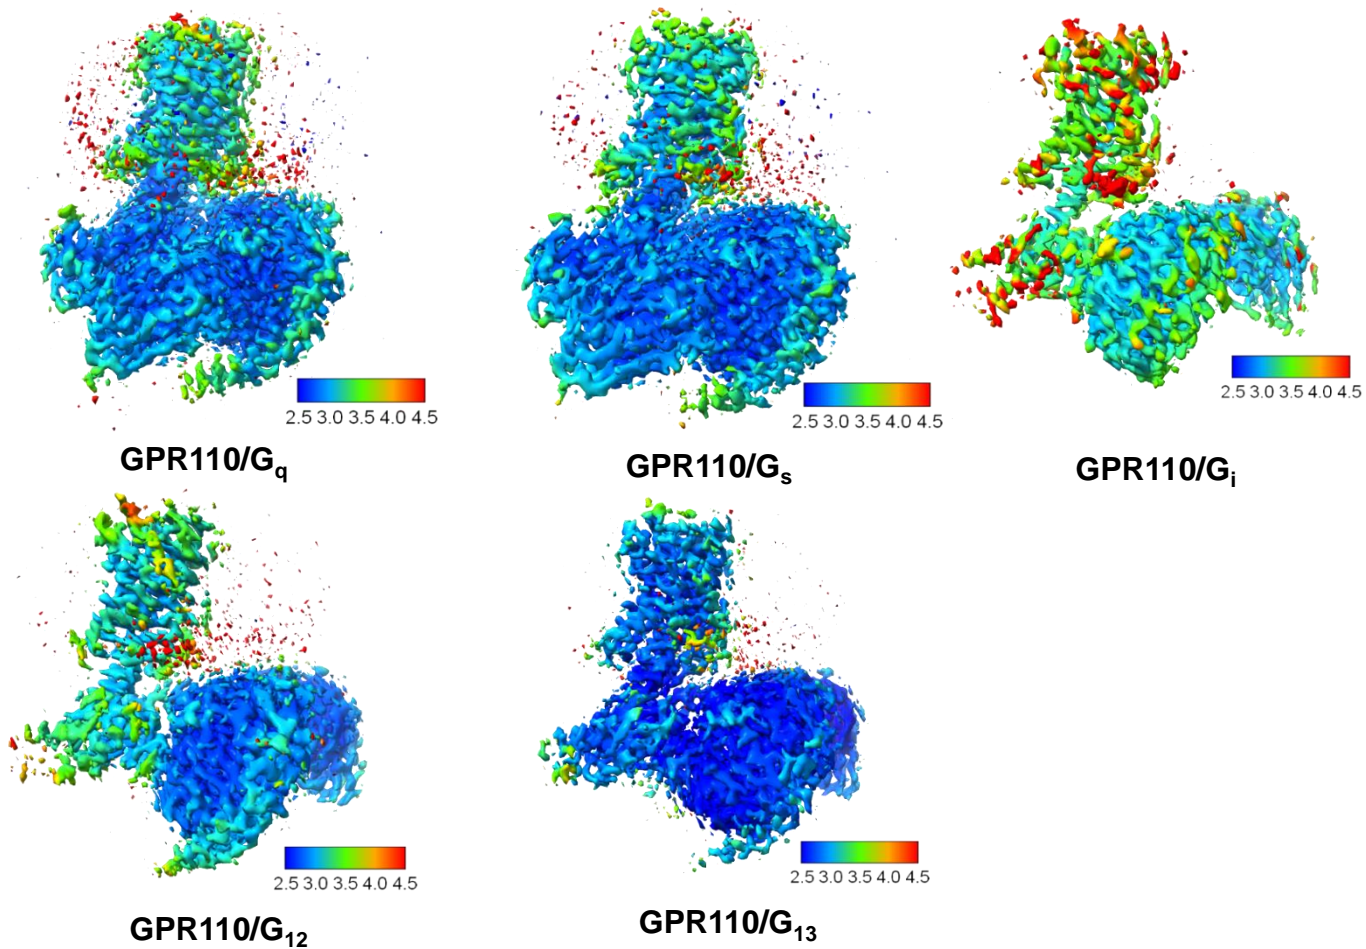**b**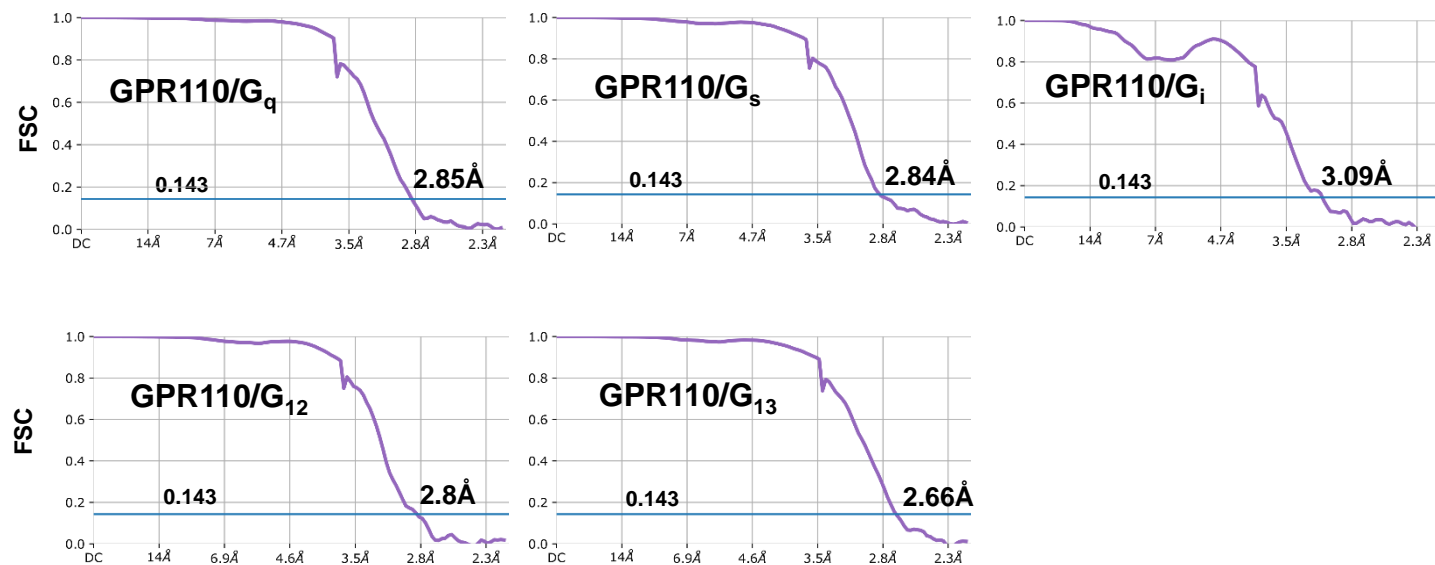

**Supplementary Fig. 4. Resolution of GPR110/G-protein complexes. a**, Local resolution analysis of GPR110/G-protein complexes. **b**, FSC curve of the GPR110/G-protein complexes, the resolution was assessed by the Gold Standard of FSC=0.143.

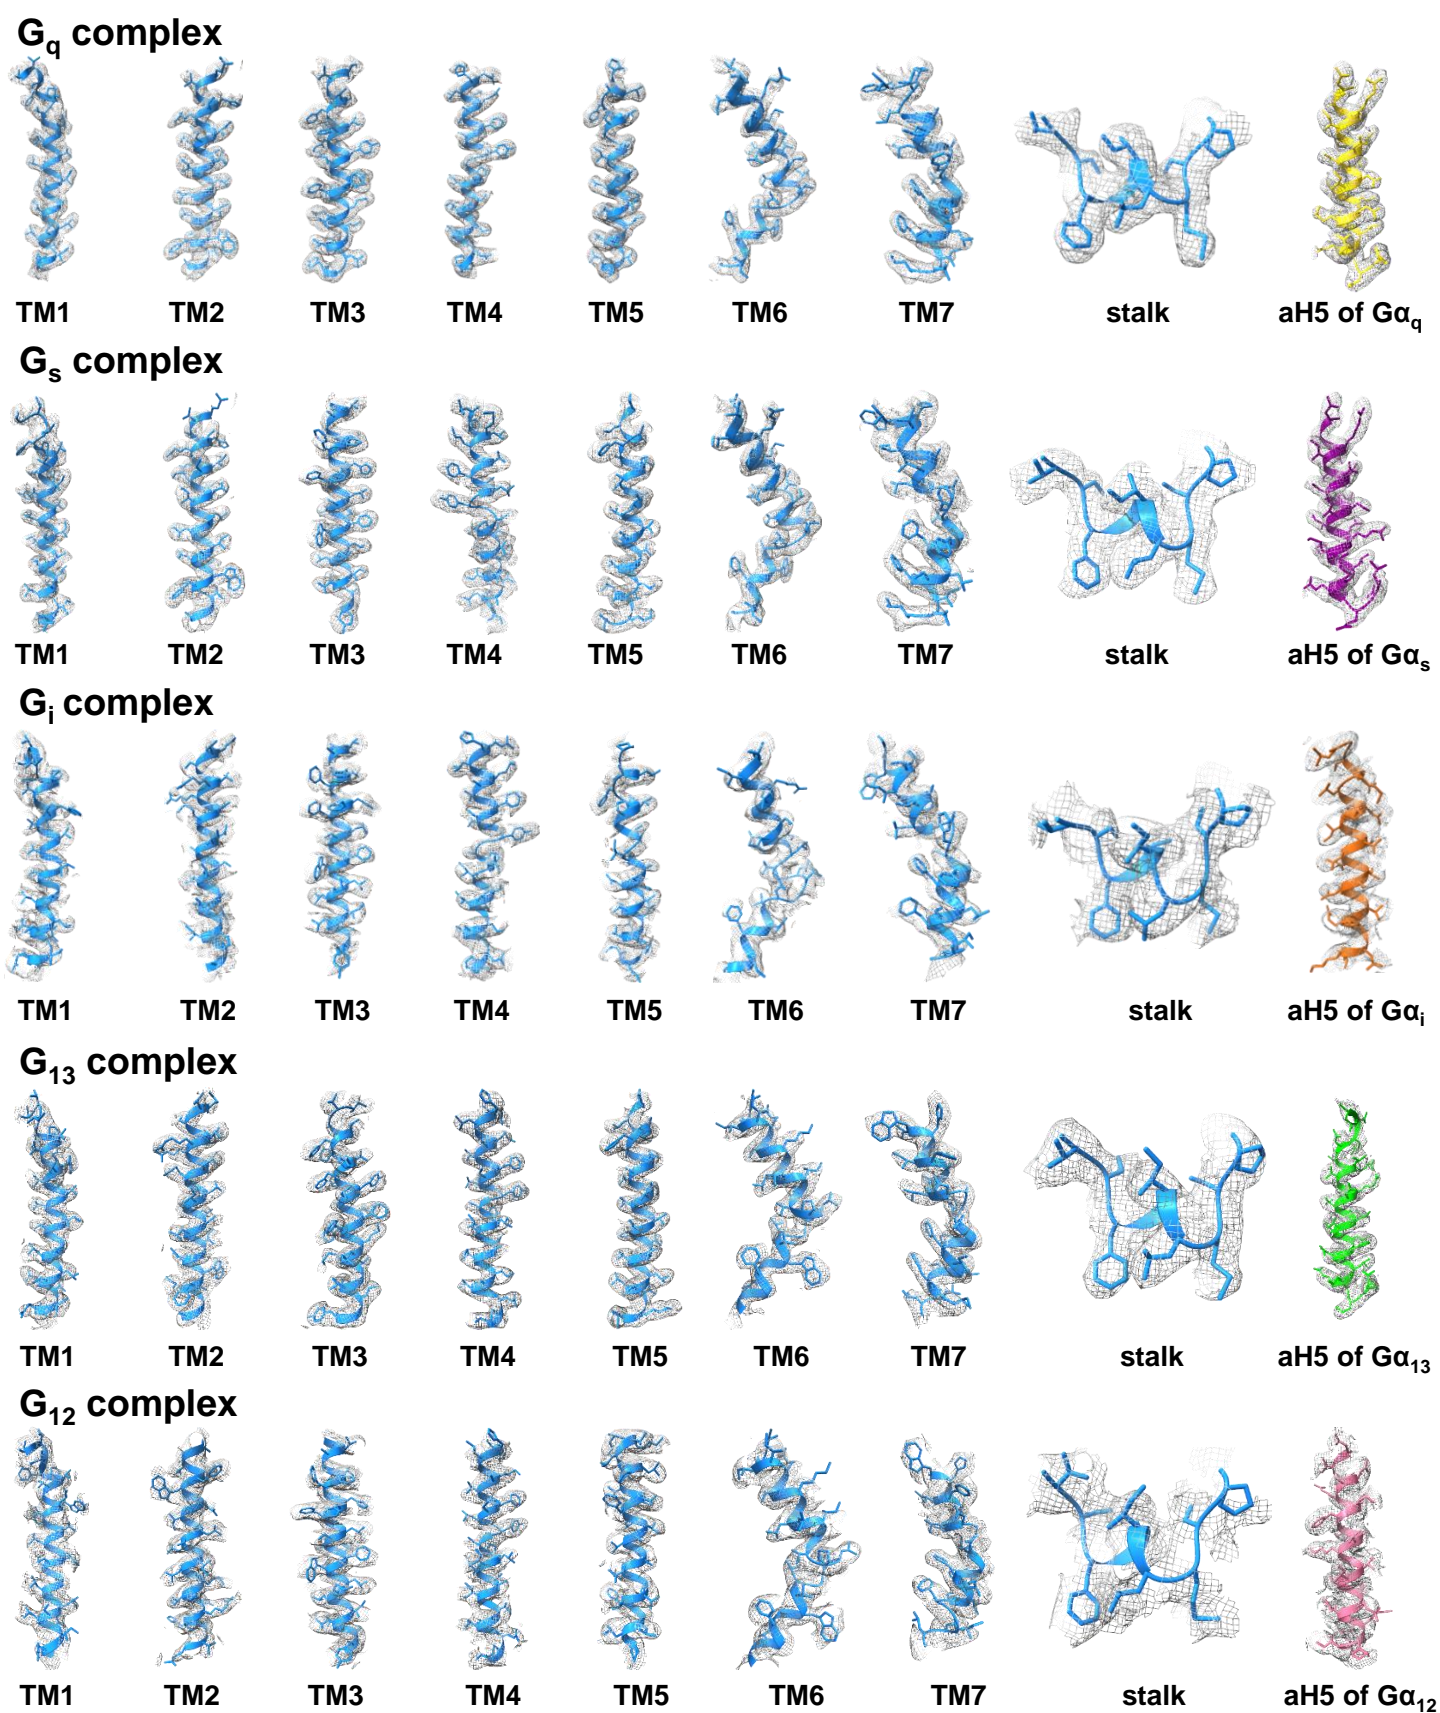

Supplementary Fig. 5. Cryo-EM density map of representative regions of GPR110/G-protein complex. Contour level of 0.08.

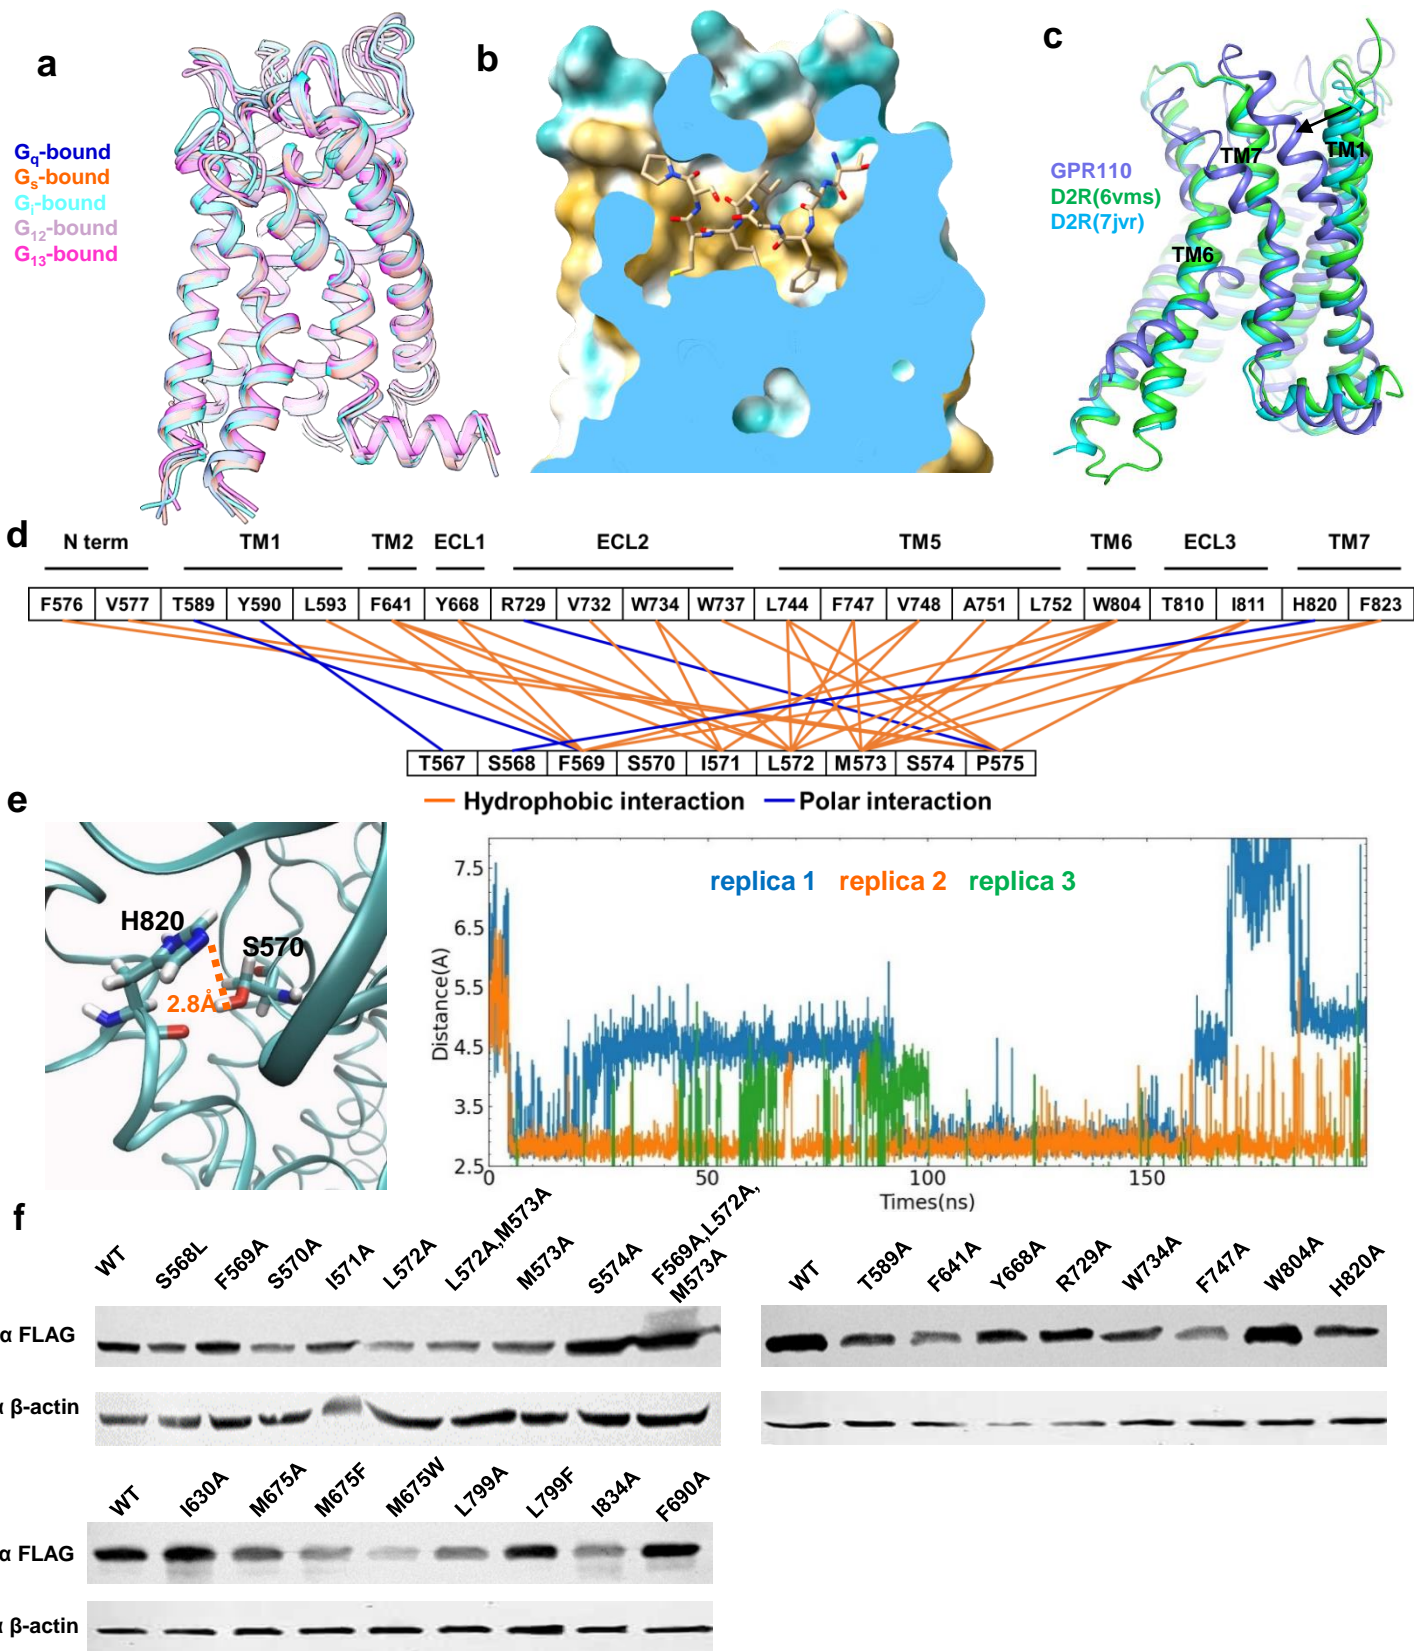

**Supplementary Fig. 6. Additional information of the ligand binding pocket of GPR110.** **a**, A comparison of  $G_q$ -bound,  $G_s$ -bound,  $G_i$ -bound,  $G_{12}$ -bound and  $G_{13}$ -bound GPR110. **b**, Hydrophobicity analysis of the ligand binding pocket of GPR110. **c**, A comparison of GPR110 with D2R. **d**, The interaction map of the stalk peptide ligand/receptor interaction of GPR110. **e**, MD simulation analysis of  $S570^{\text{stalk}}/H820^{7.39}$  interaction. Left panel, a snapshot of  $S570^{\text{stalk}}/H820^{7.39}$  interaction in a MD simulation of active GPR110; right panel, trajectory analysis of  $S570^{\text{stalk}}/H820^{7.39}$  interaction. **f**, Western-blot of GPR110 mutants in this study. The C-terminus of GPR110 was fused to a FLAG tag. Source data are provided as a Source Data file. Experiments were repeated independently 3 times with similar results.

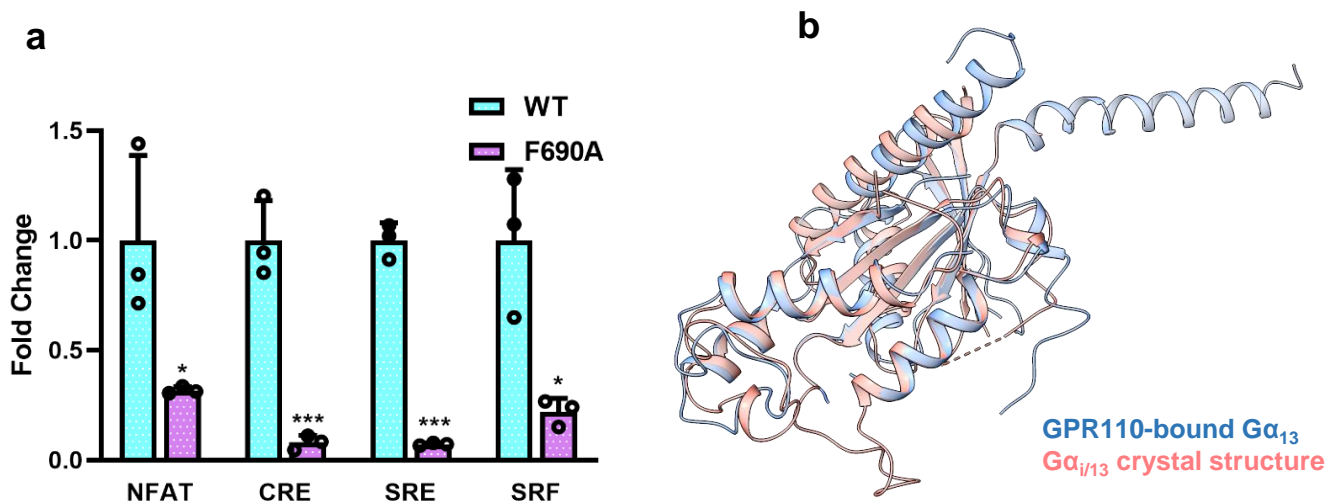

**Supplementary Fig. 7. Additional information of  $G_{12}$   $G_{13}$  engagements of GPR110 activation.** **a**, F690<sup>ICL2A</sup> decrease receptor activation in reporter assay. Data are presented as mean values  $\pm$  SD;  $n=3$  independent samples. \*,  $P < 0.05$ ; \*\*\*,  $P < 0.001$ . Data between WT and mutants were analyzed by two-sided test (for NFAT group,  $P = 0.0379$ ; for CRE group,  $P < 0.001$ ; for SRE group,  $P < 0.001$ ; for SRF group,  $P = 0.0144$ ). Source data are provided as a Source Data file. **b**, A comparison of GPR110-bound  $G\alpha_{13}$  with the crystal structure of  $G\alpha_{i/13}$  (PDB 1zcb).

**a**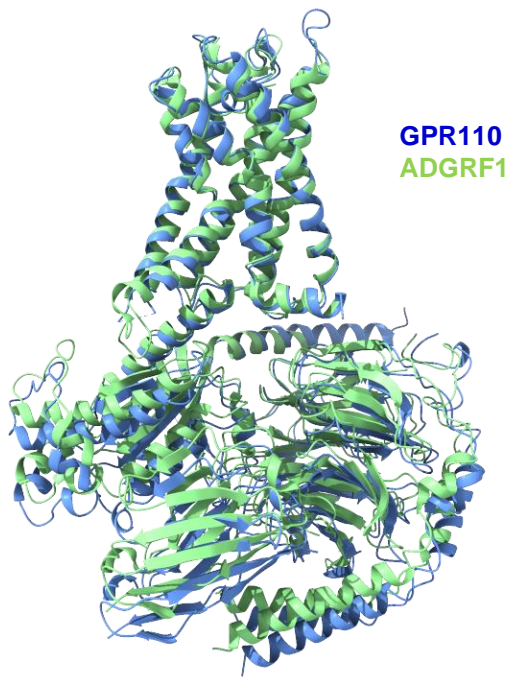**G<sub>s</sub>-complex****b**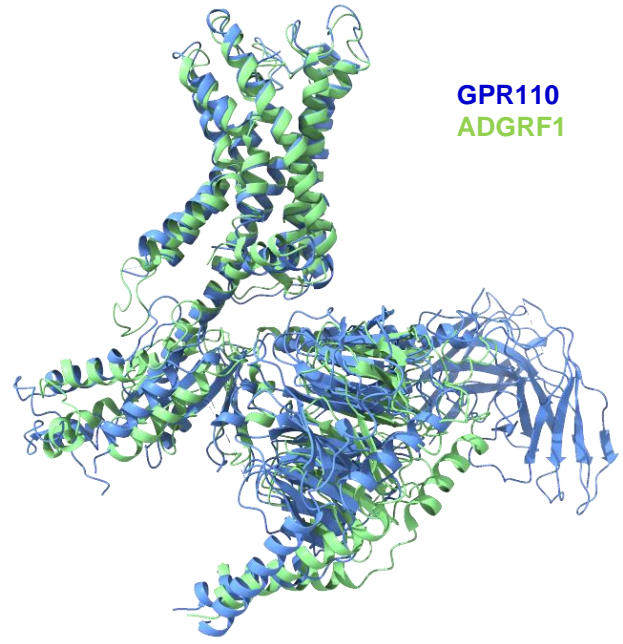**G<sub>i</sub>-complex**

**Supplementary Fig. 8. Comparisons of GPR110 with published ADGRF1 G-protein complex structures. a,** A comparison of G<sub>s</sub> engagements between GPR110 and ADGRF1 (7wu3). **b,** A comparison of G<sub>i</sub> engagements between GPR110 and ADGRF1 (7wu5).



**Supplementary Table 1. Cryo-EM data collection and refinement statistics**

|                                                     | GPR110/G <sub>q</sub><br>EMD-32881<br>7WXU | GPR110/G <sub>s</sub><br>EMD-32882<br>7WXW | GPR110/G <sub>i</sub><br>EMD-32972<br>7X2V | GPR110/G <sub>12</sub><br>EMD-32905<br>7WZ7 | GPR110/G <sub>13</sub><br>EMD-32883<br>7WY0 |
|-----------------------------------------------------|--------------------------------------------|--------------------------------------------|--------------------------------------------|---------------------------------------------|---------------------------------------------|
| <b>Data collection and processing</b>               |                                            |                                            |                                            |                                             |                                             |
| Magnification                                       | 130,000                                    | 130,000                                    | 130,000                                    | 130,000                                     | 130,000                                     |
| Voltage (kV)                                        | 300                                        | 300                                        | 300                                        | 300                                         | 300                                         |
| Electron exposure (e <sup>-</sup> /Å <sup>2</sup> ) | 60                                         | 60                                         | 60                                         | 60                                          | 60                                          |
| Defocus range (μm)                                  | 1.2-2.2                                    | 1.2-2.2                                    | 1.2-2.2                                    | 1.2-2.2                                     | 1.2-2.2                                     |
| Pixel size (Å)                                      | 0.55                                       | 0.55                                       | 0.55                                       | 0.54                                        | 0.54                                        |
| Symmetry imposed                                    | C1                                         | C1                                         | C1                                         | C1                                          | C1                                          |
| Initial particle image (no.)                        | 1.7M                                       | 2.4M                                       | 2.1M                                       | 4.0M                                        | 3.8M                                        |
| Final particle image (no.)                          | 330k                                       | 540k                                       | 260k                                       | 540k                                        | 610k                                        |
| Map resolution (Å)                                  | 2.85                                       | 2.84                                       | 3.09                                       | 2.8                                         | 2.66                                        |
| FSC threshold                                       | 0.143                                      | 0.143                                      | 0.143                                      | 0.143                                       | 0.143                                       |
| <b>Refinement</b>                                   |                                            |                                            |                                            |                                             |                                             |
| Initial model used (PDB code)                       | AF-Q5T601-F1, 7f4d                         | AF-Q5T601-F1, 7f4d                         | AF-Q5T601-F1, 6vms                         | AF-Q5T601-F1, 6vms                          | AF-Q80TS3-F1, 6vms                          |
| Model Resolution (Å)                                | 3.3                                        | 3.3                                        | 3.3                                        | 3.3                                         | 3.3                                         |
| FSC threshold                                       | 0.143                                      | 0.143                                      | 0.143                                      | 0.143                                       | 0.143                                       |
| Map sharpening <i>B</i> factor (Å <sup>2</sup> )    | -118.6                                     | -122.4                                     | -109.1                                     | -125.7                                      | -107.9                                      |
| Model composition                                   |                                            |                                            |                                            |                                             |                                             |
| Non-hydrogen atoms                                  | 8116                                       | 8121                                       | 8761                                       | 8676                                        | 8724                                        |
| Protein residues                                    | 1034                                       | 1032                                       | 1123                                       | 1108                                        | 1112                                        |
| Ligands                                             | 0                                          | 0                                          | 0                                          | 0                                           | 0                                           |
| <i>B</i> factor (Å <sup>2</sup> )                   |                                            |                                            |                                            |                                             |                                             |
| Protein                                             | 43.68                                      | 42.53                                      | 30                                         | 30                                          | 28.3                                        |
| Ligand                                              |                                            |                                            |                                            |                                             |                                             |
| R.m.s. deviations                                   |                                            |                                            |                                            |                                             |                                             |
| Bond length (Å)                                     | 0.009                                      | 0.006                                      | 0.008                                      | 0.01                                        | 0.008                                       |
| Bond angles (°)                                     | 1.148                                      | 1.088                                      | 1.174                                      | 1.204                                       | 1.146                                       |
| Validation                                          |                                            |                                            |                                            |                                             |                                             |
| MolProbity score                                    | 1.2                                        | 1.15                                       | 1.68                                       | 1.7                                         | 1.79                                        |
| Clashscore                                          | 1.05                                       | 1.23                                       | 5.54                                       | 6.04                                        | 6.75                                        |
| Poor rotamers (%)                                   | 0                                          | 0                                          | 0                                          | 0                                           | 0                                           |
| Ramachandran plot                                   |                                            |                                            |                                            |                                             |                                             |
| Favored (%)                                         | 94.22                                      | 95.58                                      | 94.48                                      | 94.57                                       | 93.76                                       |
| Allowed (%)                                         | 5.78                                       | 4.42                                       | 5.52                                       | 5.43                                        | 6.24                                        |
| Disallowed                                          | 0                                          | 0                                          | 0                                          | 0                                           | 0                                           |
